# Supplementary material for: Expression of uc.189 and its clinicopathologic significance in gynecological cancers
Source: PubMed Central journal article supplement (PMC5800915; doi:10.18632/oncotarget.23761), 2017-12-29
Supplement: oncotarget-09-7453-s001.pdf [file oncotarget-09-7453-s001.pdf]

## Expression of uc.189 and its clinicopathologic significance in gynecological cancers

### SUPPLEMENTARY MATERIALS

**Supplementary Table 1: Characteristics of the study subjects with OCA**

| Clinicopathologic features          | Number | Percentage (%) |
|-------------------------------------|--------|----------------|
| Age (years)                         |        |                |
| <60                                 | 9      | 31.0           |
| ≥60                                 | 20     | 69.0           |
| Tumor size (cm)                     |        |                |
| <5                                  | 12     | 41.4           |
| ≥5                                  | 17     | 58.6           |
| Pathological type                   |        |                |
| serous cystadenoma                  | 7      | 24.1           |
| serous papillary cystadenocarcinoma | 22     | 75.9           |
| Pathological grade                  |        |                |
| I + II                              | 5      | 17.2           |
| III                                 | 24     | 82.8           |
| Tumor invasive depth                |        |                |
| T1 + T2                             | 11     | 37.9           |
| T3 + T4                             | 18     | 62.1           |
| lymph node metastasis               |        |                |
| negative                            | 13     | 44.8           |
| positive                            | 16     | 55.2           |
| Distant metastasis                  |        |                |
| M0                                  | 26     | 89.7           |
| M1                                  | 3      | 10.3           |
| Tumor stage                         |        |                |
| I                                   | 13     | 44.8           |
| II                                  | 6      | 20.7           |
| III                                 | 7      | 24.1           |
| IV                                  | 3      | 10.4           |
| Follow-up time (months)             |        | 6–84           |
| Prognosis                           |        |                |
| alive                               | 9      | 31.0           |
| dead                                | 15     | 51.7           |
| unknown                             | 5      | 17.3           |
| patients lived for ≥ 5 years        | 16     | 55.2           |
| patients lived for < 5 years        | 11     | 37.9           |
| Unknown                             | 2      | 6.9            |
